# Supplementary material
Source: MDPI journal article supplement (https://www.mdpi.com/2673-3978/3/1/13)
Supplement: s1 [file s1]

Supporting Materials

# Copper-Content Dependent Structural and Electrical Properties of CZTS Films formed by “Green” Colloidal Nanocrystals

Volodymyr Dzhagan <sup>1,2,\*</sup>, Oleksandr Selyshchev <sup>3,4</sup>, Serhiy Kondratenko <sup>2</sup>, Nazar Mazur <sup>1</sup>, Yevhenii Havryliuk <sup>1,3,4</sup>, Oleksandra Raievska <sup>3,4,5</sup>, Oleksandr Stroyuk <sup>5</sup> and Dietrich R. T. Zahn <sup>3,4</sup>

- <sup>1</sup> V. Lashkaryov Institute of Semiconductors Physics, National Academy of Sciences of Ukraine, 41 Nauky av., 03028 Kyiv, Ukraine; nazarmazur@isp.kiev.ua (N.M.); yevhenii.havryliuk@physik.tu-chemnitz.de (Y.H.)
- <sup>2</sup> Physics Department, Taras Shevchenko National University of Kyiv, 64 Volodymyrs'ka St., 01601 Kyiv, Ukraine; kondratenko@ukr.net (S.K.)
- <sup>3</sup> Semiconductor Physics, Chemnitz University of Technology, 09107 Chemnitz, Germany; oleksandr.selyshchev@physik.tu-chemnitz.de (O.S.); o.raievska@fz-juelich.de (O.R.); zahn@physik.tu-chemnitz.de (D.R.T.Z.)
- <sup>4</sup> Center for Materials, Architectures and Integration of Nanomembranes (MAIN), Chemnitz University of Technology, 09107 Chemnitz, Germany
- <sup>5</sup> Forschungszentrum Jülich GmbH, Helmholtz-Institut Erlangen Nürnberg für Erneuerbare Energien (HI ERN), Immerwahrstr. 2, 91058 Erlangen, Germany; alstroyuk@ukr.net
- \* Correspondence: dzhagan@isp.kiev.ua

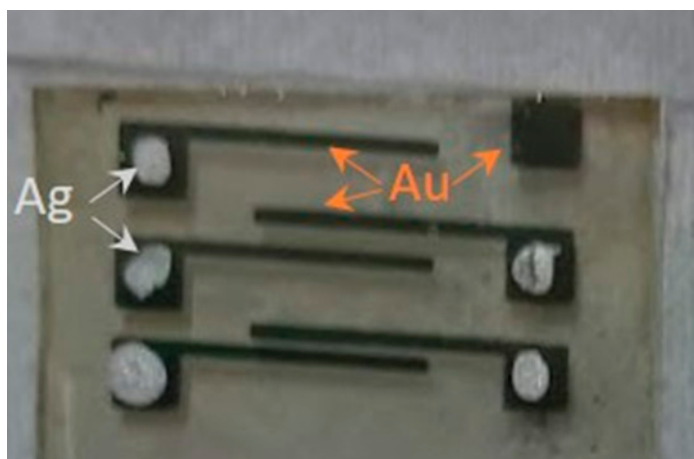

**Figure S1.** A representative photograph of the sample used for electrical measurements of the CZTS NC films in this work. NC film is deposited on a glass substrate by spin-coating, gold contacts deposited on the NC film by thermal evaporation, silver paste on top of the gold contact pads, and thermal paste on the bottom of the substrate.

**Table S1.** Elemental compositions (in atomic %) derived from XPS on the CZTS NC samples with different nominal Cu content for the initial and annealed films. The sulfide sulfur ( $S^{2-}$ ) associated with the NC structure and thioglycolate associated with the NC surface ( $S^{1-}$ ) are taken into account, which is the most suitable approach for representing the composition of TGA stabilized CZTS colloidal NCs according to our previous work [1].

|                                      | Cu <sub>0.25</sub><br>120 °C | Cu <sub>0.25</sub><br>220 °C | Cu <sub>2</sub><br>120 °C | Cu <sub>2</sub><br>220 °C | Cu <sub>4</sub><br>120 °C | Cu <sub>4</sub><br>220 °C | Ideal<br>Cu <sub>2</sub> ZnSnS <sub>4</sub> |
|--------------------------------------|------------------------------|------------------------------|---------------------------|---------------------------|---------------------------|---------------------------|---------------------------------------------|
| Cu                                   | 9                            | 6                            | 22                        | 16                        | 34                        | 16                        | 25                                          |
| Zn                                   | 39                           | 30                           | 25                        | 21                        | 21                        | 46                        | 12.5                                        |
| Sn                                   | 5                            | 6                            | 7                         | 10                        | 2                         | 4                         | 12.5                                        |
| (S <sup>2-</sup> + S <sup>1-</sup> ) | 47                           | 59                           | 46                        | 53                        | 43                        | 35                        | 50                                          |

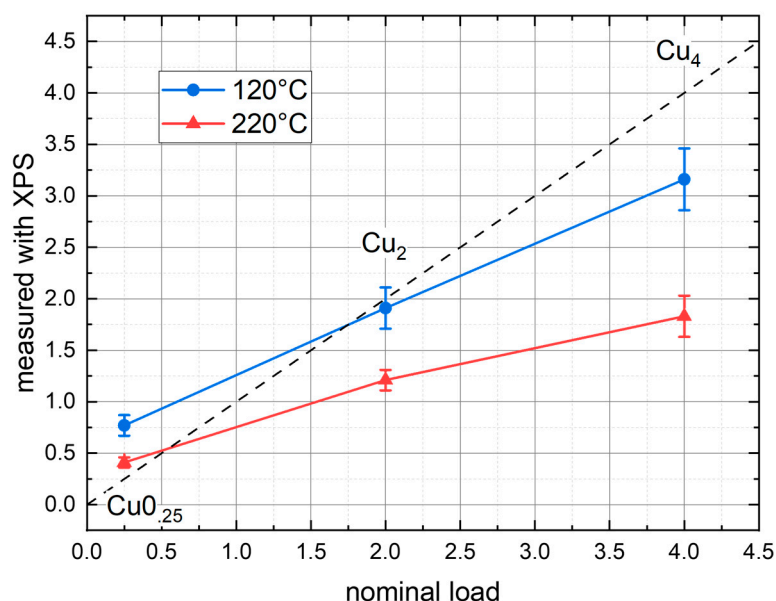

**Figure S2.** XPS-derived copper contents in CZTS films, normalized for sulfur content ( $S_4$ ) for comparison with the stoichiometric kesterite  $Cu_2ZnSnS_4$ . The data correspond to the films heated at 120 °C (initial) and 220 °C (annealed). The dashed line is an eye guide for the ideal case of matching the measured amount of copper with its nominal load.

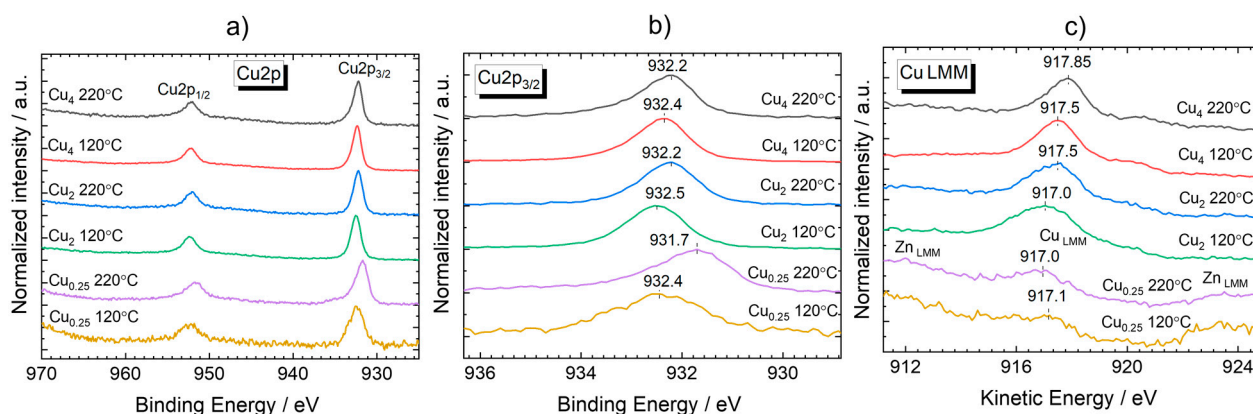

**Figure S3.** Extended Cu2p (a), narrow Cu2p<sub>3/2</sub> (b), and Cu<sub>LMM</sub> Auger (c) high-resolution XPS spectra of pristine and annealed CZTS NC films synthesized with different nominal copper contents.

**Table S2.** Vibrational modes of carboxylic groups detected in the middle-infrared spectra of Cu<sub>4</sub>, Cu<sub>2</sub>, and Cu<sub>0.25</sub> initial (*i.e.* heated at 120 °C) and annealed at 220 °C samples.

| Sample                    | $\nu(\text{COO})$ sym.<br>/cm <sup>-1</sup> | $\nu(\text{COO})$ asym.<br>/cm <sup>-1</sup> | $\Delta$ /cm <sup>-1</sup> | Most Probable Assignment<br>[2,3]  |
|---------------------------|---------------------------------------------|----------------------------------------------|----------------------------|------------------------------------|
| Cu <sub>4</sub> 120 °C    | 1395                                        | 1570                                         | 175                        | Zn- or Cu- <b>chelate</b> bonding  |
| Cu <sub>2</sub> 120 °C    | 1380                                        | 1565                                         | 185                        |                                    |
| Cu <sub>0.25</sub> 120 °C | 1385                                        | 1645 (shoulder)                              | 260                        | Sn-bonding                         |
| Cu <sub>4</sub> 220 °C    | 1390                                        | 1590                                         | 200                        | Zn- or Cu- <b>bridging</b> bonding |
| Cu <sub>2</sub> 220 °C    | 1390                                        | 1590                                         | 200                        |                                    |
| Cu <sub>0.25</sub> 220 °C | 1390                                        | 1590                                         | 200                        |                                    |

## References

1. Stroyuk, O.; Raevskaya, A.; Selyshchev, O.; Dzhagan, V.; Gaponik, N.; Zahn, D.R.T.; Eychmüller, A. "Green" Aqueous Synthesis and Optical Characterization of Colloidal  $Cu_2ZnSnS_4$  Nanocrystal Inks. *Sci. Rep.* **2018**, *8*, 13677.

2. Nakamoto, K. Infrared and Raman Spectra of Inorganic and Coordination Compounds: Part A: Theory and Applications in Inorganic Chemistry. John Wiley & Sons Inc.: Hoboken, NJ, USA, 2009.
3. Ito, K.; Bernstein, H.J. The Vibrational Spectra of the Formate, Acetate, and Oxalate Ions. *Can. J. Chem.* **1956**, *34*, 170.
